# Supplementary material for: Morphologies and dynamics of linear ABC triblock copolymers with different block sequences
Source: Royal Society of Chemistry journal article supplement (doi:10.1039/c4ra13814g), 2014-12-22

# Morphologies and Dynamics of Linear ABC Triblock Copolymers with Different Block Sequences

Yang Zhou,<sup>a,\*</sup> Xinping Long,<sup>c</sup> Xianggui Xue,<sup>a</sup> Wen Qian,<sup>a</sup> and Chaoyang Zhang<sup>a</sup>

<sup>a</sup> Institute of Chemical Materials, Chinese Academy of Engineering and Physics, Mianyang, 621900; <sup>b</sup> The 1st Affiliated Hospital of Dalian Medical University, Dalian, 116000; <sup>c</sup> Chinese Academy of Engineering and Physics, Mianyang, 621900, China. E-mail: xia\_honggang@126.com (H.X.) and zhouy@caep.cn (Y.Z.).

## Supporting Information

### Figure Legends

**Figure S1.** Morphological phase diagrams of linear triblocks, taking *l*-ABC (4-4-4) as a starting point. Color scheme in the snapshots: A (red), B (blue), C (green).

**Figure S2.** Morphological phase diagrams of linear triblocks, taking *l*-ABC (8-8-8) as a starting point. Color scheme in the snapshots: A (red), B (blue), C (green).

**Figure S3.** Morphological phase diagrams of linear triblocks, taking *l*-ACB (4-4-4) as a starting point. Color scheme in the snapshots: A (red), B (blue), C (green).

**Figure S4.** Morphological phase diagrams of linear triblocks, taking *l*-ACB (8-8-8) as a starting point. Color scheme in the snapshots: A (red), B (blue), C (green).

**Figure S5.** Morphological phase diagrams of linear triblocks, taking *l*-BAC (4-4-4) as a starting point. Color scheme in the snapshots: A (red), B (blue), C (green).

**Figure S6.** Morphological phase diagrams of linear triblocks, taking *l*-BAC (8-8-8) as a starting point. Color scheme in the snapshots: A (red), B (blue), C (green).

Figure S1.

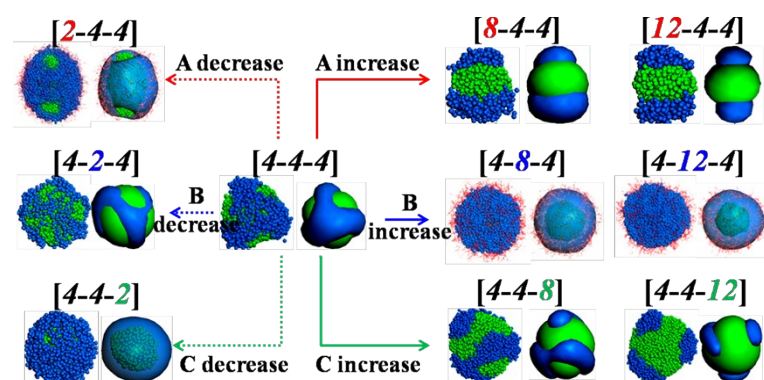

Figure S2.

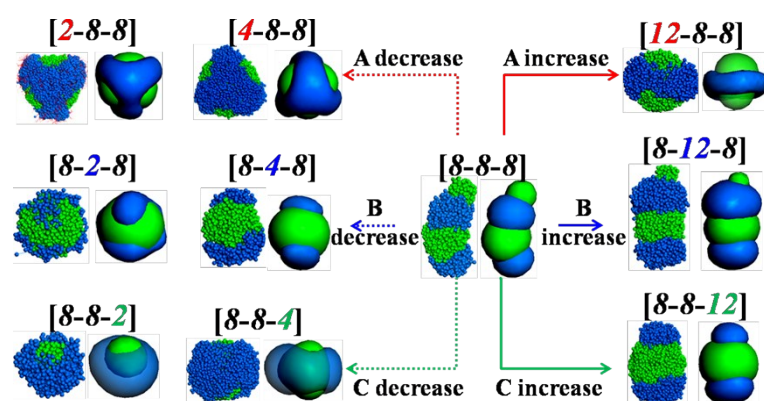

Figure S3.

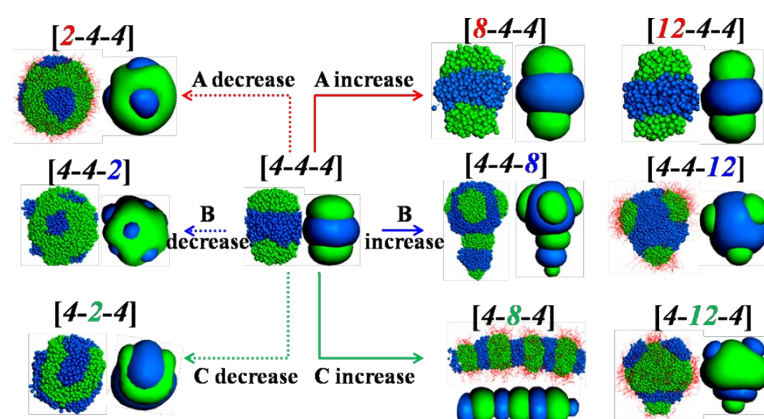

Figure S4.

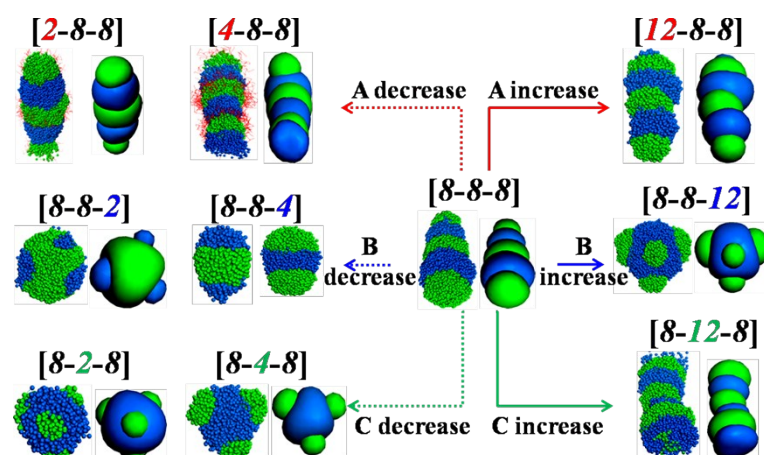

Figure S5.

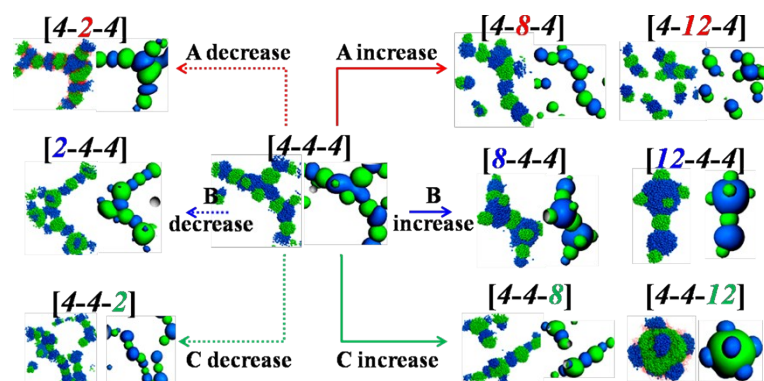

Figure S6.

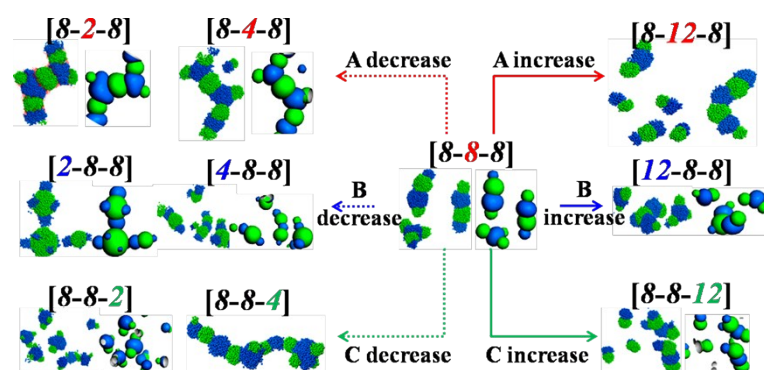

Supplement: c4ra13814g1.pdf [file c4ra13814g1.pdf]
